# Supplementary material for: Spectral convolutional neural network chip for in-sensor edge computing of incoherent natural light
Source: PubMed Central journal article supplement — Nat Commun. 2025 Jan 2;16:81. doi: 10.1038/s41467-024-55558-3 (PMC11696300; doi:10.1038/s41467-024-55558-3), 2025-01-02
Supplement: 41467_2024_55558_MOESM2_ESM.pdf [file 41467_2024_55558_MOESM2_ESM.pdf]

## **Description of Additional Supplementary Files**

**File Name:** Supplementary Movie 1

**Description:** Demo video of the metasurface-based SCNN

**File Name:** Supplementary Movie 2

**Description:** Demo video of the pigment-based SCNN
